# Supplementary material for: Conformational Ensembles Explored Dynamically from Disordered Peptides Targeting Chemokine Receptor CXCR4
Source: PubMed Central journal article supplement (PMC4490436; doi:10.3390/ijms160612159), 2015-05-28
Supplement: ijms-16-12159-s001.pdf [file ijms-16-12159-s001.pdf]

## Supplementary Information

**Table S1.** Chemical shifts (ppm) of PepE evaluated at 600 MHz and 298 K.

| Residue  | H <sub>N</sub> | H <sub>α</sub> | H <sub>β</sub> | H <sub>γ</sub> | Others                             |
|----------|----------------|----------------|----------------|----------------|------------------------------------|
| ♦ 1Y     |                | 4.23           | 3.13           |                | Hδ 7.16<br>Hε 6.88                 |
| 2G       | 8.56           | 3.98<br>3.82   |                |                |                                    |
| 3E       | 8.46           | 4.33           | 2.08<br>1.97   | 2.42           |                                    |
| 4C       | 8.47           | 4.77           | 2.94<br>2.87   |                |                                    |
| 5P       |                | 4.45           | 2.30           | 2.03<br>1.96   | Hδ 3.77                            |
| 6C       | 8.38           | 4.49           | 2.94           |                |                                    |
| 7Allyl-E | 8.58           | 4.48           | 2.22<br>2.02   | 2.46           | Allyl group 5.96, 5.36, 5.30, 4.75 |

♦ Amino acids are indicated by the one letter codes preceded by sequence number.

**Table S2.** Chemical shifts (ppm) of PepK evaluated at 600 MHz and 298 K.

| Residue  | H <sub>N</sub> | H <sub>α</sub> | H <sub>β</sub> | H <sub>γ</sub> | Others                                                        |
|----------|----------------|----------------|----------------|----------------|---------------------------------------------------------------|
| ♦ 1Y     |                | 4.24           | 3.13           |                | Hδ 7.16, 7.11<br>Hε 6.88, 6.84                                |
| 2G       | 8.57           | 3.98<br>3.82   |                |                |                                                               |
| 3E       | 8.50           | 4.32           | 2.04<br>1.96   | 2.39           |                                                               |
| 4C       | 8.53           | 4.78           | 2.91           |                |                                                               |
| 5P       |                | 4.45           | 2.30           | 2.02<br>1.95   | Hδ 3.78                                                       |
| 6C       | 8.39           | 4.49           | 2.93           |                |                                                               |
| 7Allyl-K | 8.61           | 4.42           | 1.94<br>1.80   | 1.45           | Hε 2.99<br>Hδ 1.68<br>Hζ 7.53<br>Allyl 5.95, 5.34, 5.28, 4.67 |

♦ Amino acids are indicated by the one letter codes preceded by sequence number.

**Table S3.** Chemical shift deviations of  $H_{\alpha}$  protons from random coil values (CSD) for PepE [24]. The CSD value for Allyl-E (residue number 7) is not shown due to the lack of a tabulated random coil value for the modified amino-acid. For Gly average  $H_{\alpha}$  chemical shift values were taken into accounts.

| <b>Residue</b> | <b><math>H_{\alpha_{obs}}</math></b> | <b><math>H_{\alpha_{randomcoil}}</math></b> | <b>CSD (<math>H_{\alpha_{obs}} - H_{\alpha_{randomcoil}}</math>)</b> |
|----------------|--------------------------------------|---------------------------------------------|----------------------------------------------------------------------|
| ♦ 1Y           | 4.23                                 | 4.43                                        | -0.2                                                                 |
| 2G             | 3.98                                 | 4.11                                        | 0.02                                                                 |
|                | 3.82                                 | 3.65                                        |                                                                      |
| 3E             | 4.33                                 | 4.24                                        | 0.09                                                                 |
| 4C             | 4.77                                 | 4.52                                        | 0.25                                                                 |
| 5P             | 4.45                                 | 4.33                                        | 0.12                                                                 |
| 6C             | 4.49                                 | 4.52                                        | -0.03                                                                |
| 7Allyl-E       | 4.48                                 | -                                           | -                                                                    |

♦ Amino acids are indicated by the one letter codes preceded by sequence number.

**Table S4.** CSD (*i.e.*,  $H_{\alpha_{obs}} - H_{\alpha_{randomcoil}}$ ) of PepK.

| <b>Residue</b> | <b><math>H_{\alpha_{obs}}</math></b> | <b><math>H_{\alpha_{randomcoil}}</math></b> | <b>CSD (<math>H_{\alpha_{obs}} - H_{\alpha_{randomcoil}}</math>)</b> |
|----------------|--------------------------------------|---------------------------------------------|----------------------------------------------------------------------|
| ♦ 1Y           | 4.24                                 | 4.43                                        | -0.19                                                                |
| 2G             | 3.98                                 | 4.11                                        | 0.02                                                                 |
|                | 3.82                                 | 3.65                                        |                                                                      |
| 3E             | 4.32                                 | 4.24                                        | 0.08                                                                 |
| 4C             | 4.78                                 | 4.52                                        | 0.26                                                                 |
| 5P             | 4.45                                 | 4.33                                        | 0.12                                                                 |
| 6C             | 4.49                                 | 4.52                                        | -0.03                                                                |
| 7Allyl-K       | 4.42                                 | -                                           | -                                                                    |

♦ Amino acids are indicated by the one letter codes preceded by sequence number.

**Table S5.** The average number of H-bonds that each residue in PepE and PepK formed with water molecules during MD simulations.

| <b>Residue</b> | <b>PepE</b> | <b>PepK</b> |
|----------------|-------------|-------------|
| Y              | 7           | 8           |
| G              | 3           | 2           |
| E              | 9           | 6           |
| C              | 2           | 1           |
| P              | 1           | 3           |
| C              | 2           | 4           |
| E or K         | 9           | 6           |

Amino acids are indicated by the one letter codes.

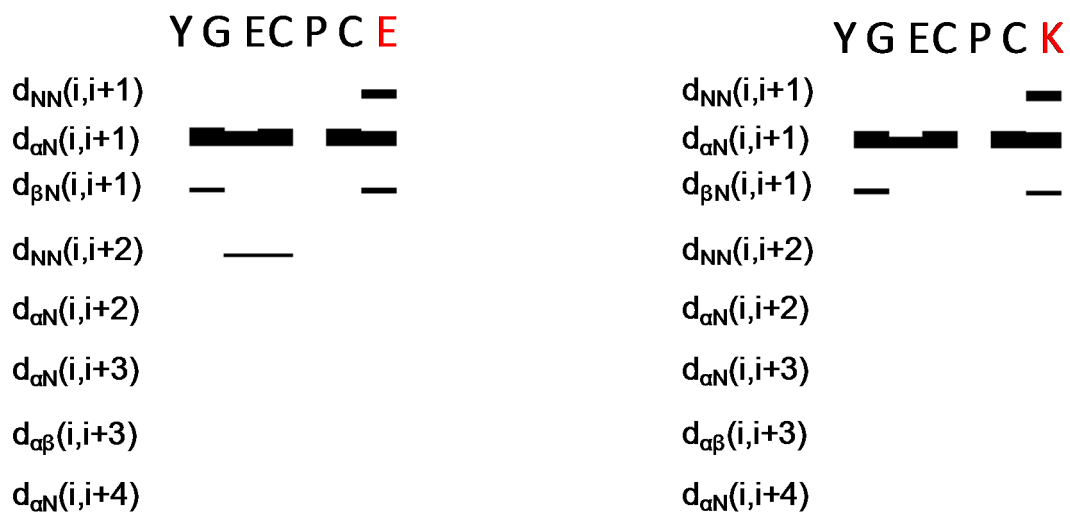

**Figure S1.** ROE diagrams for PepE (**left**) and PepK (**right**) in H<sub>2</sub>O/D<sub>2</sub>O (90/10). Peptide sequences are reported on the top; “ $d_{lm}(i, i + x)$ ” indicates a contact between the Hl and Hm protons in the  $i$  and  $i + x$  residue respectively. The allyl-containing amino acids are highlighted in red.

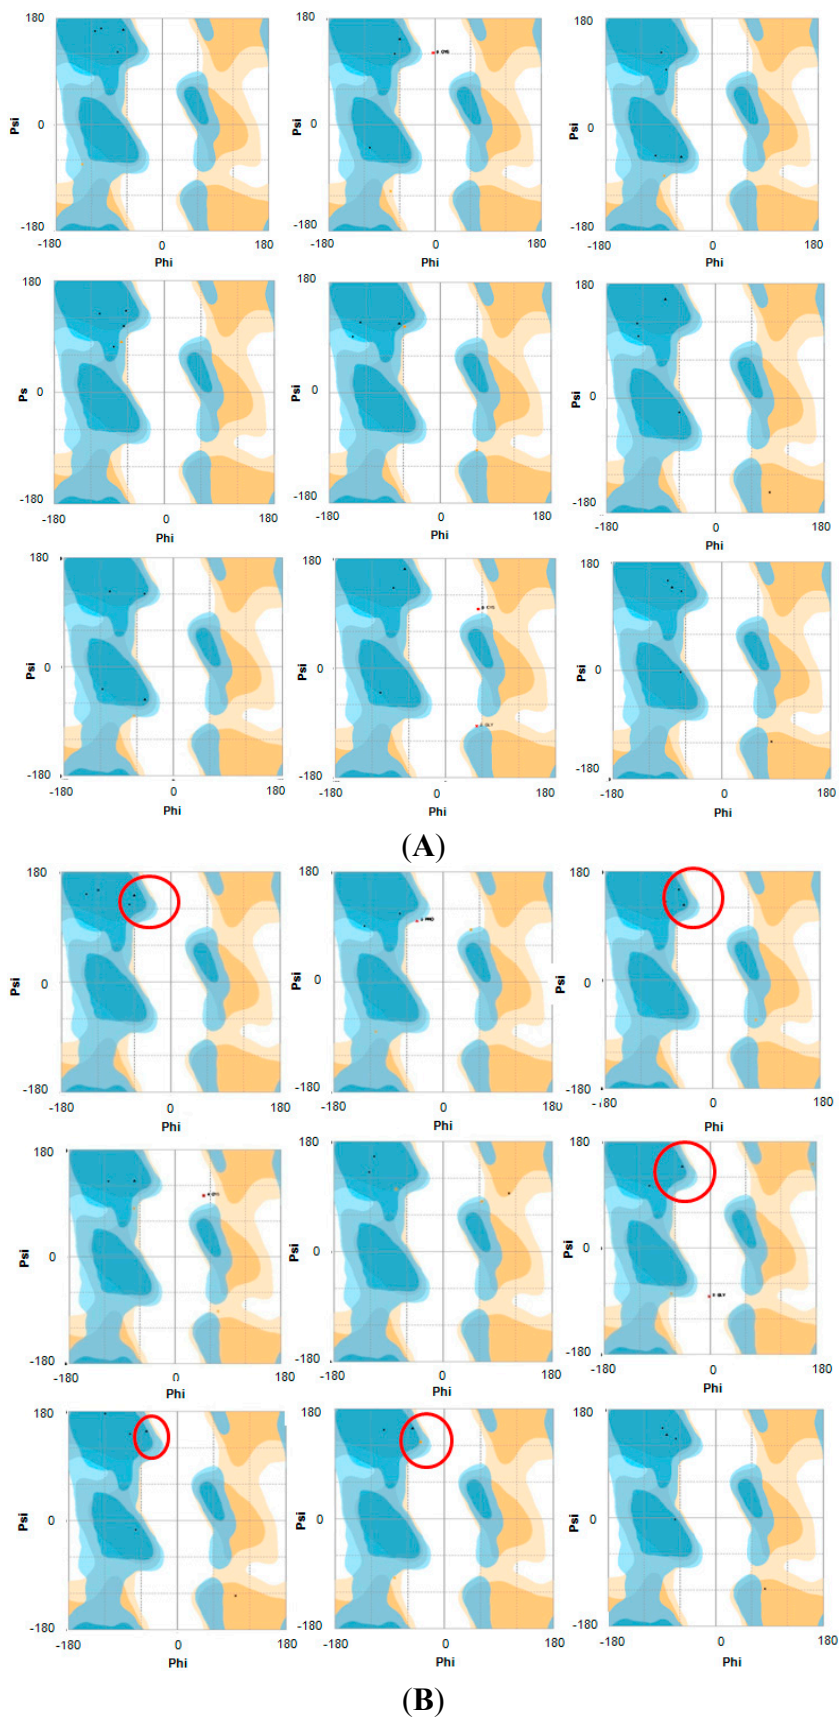

**Figure S2.** Ramachandran Plot for nine and eight clusters obtained for PepE (A) and PepK (B), respectively. We indicate by red circle the residues present in the polyproline II region.

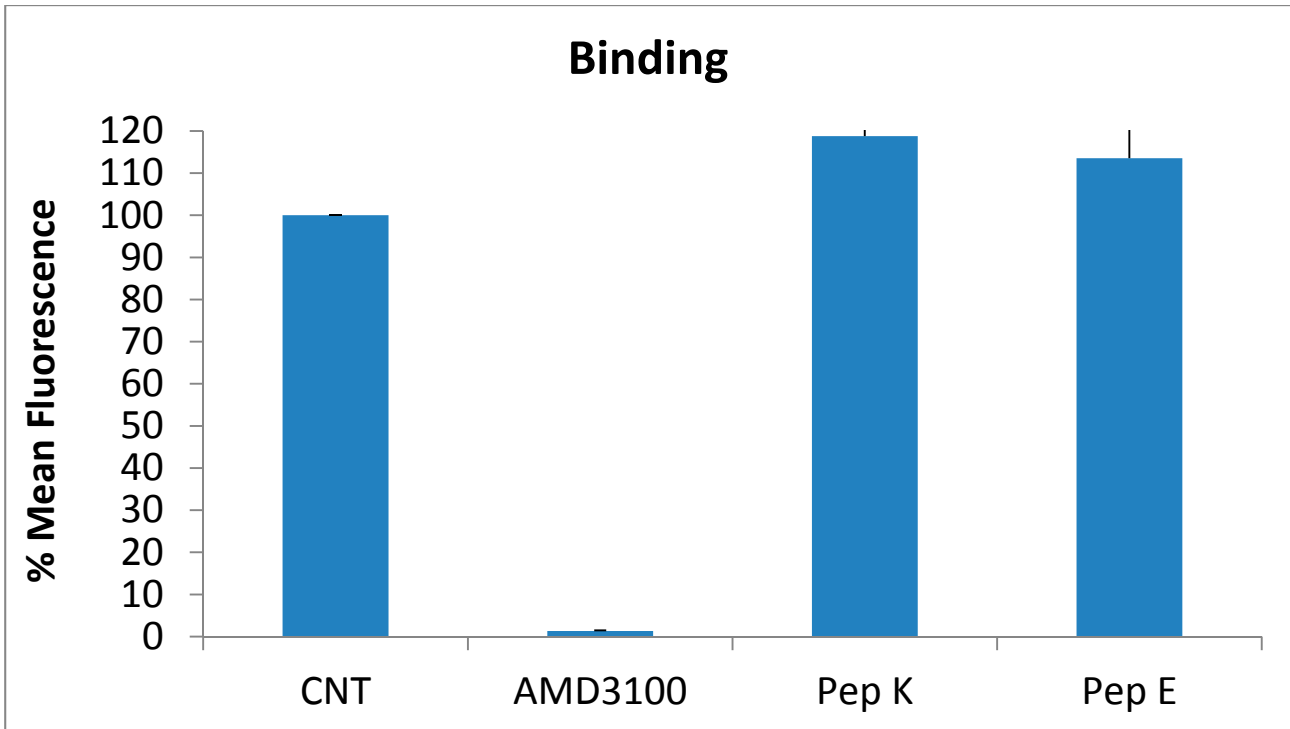

**Figure S3.** Binding of peptides to CXCR4. The binding was evaluated indirectly through flow cytometry. In particular, histograms indicate the fluorescence percentage for CXCR4 antibody (CNT), AMD3100, PepK and PepE.

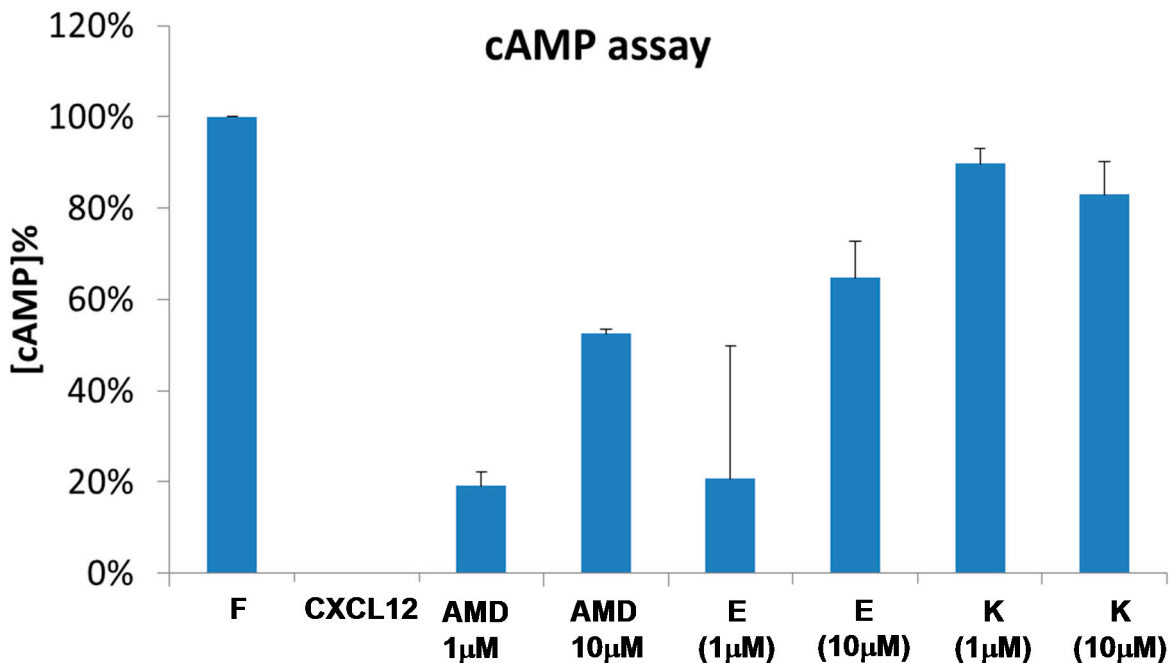

**Figure S4.** Comparison of inhibition of cAMP modulation by PepE, PepK and AMD3100 at 1 and 10 μM. Briefly, cells were incubated in the presence of AMD3100, PepE or PepK in the presence of CXCL12 plus Forskolin. CXCL12 100 ng/mL: maximal Gi protein activity; Forskolin 1 μM: maximal adenylate cyclase activity.

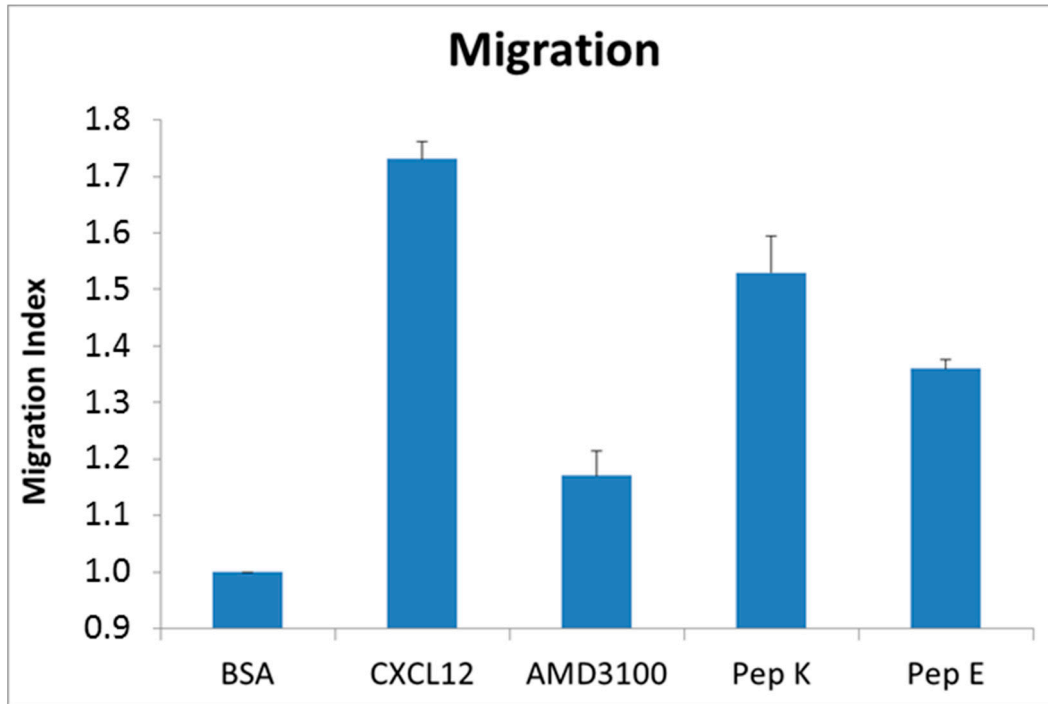

**Figure S5.** Migration assays. We report the migration index relative to migration in presence of BSA alone, and of CXCL12, AMD3100, PepK and PepE.
